# Supplementary material for: Cisplatin-Resistance in Oral Squamous Cell Carcinoma: Regulation by Tumor Cell-Derived Extracellular Vesicles
Source: PubMed Central journal article supplement (PMC6721547; doi:10.3390/cancers11081166), 2019-08-14

# Supplemental Materials: Cisplatin-Resistance in Oral Squamous Cell Carcinoma: Regulation by Tumor Cell-Derived Extracellular Vesicles

Xin-Hui Khoo, Ian C Paterson, Bey-Hing Goh and Wai-Leng Lee

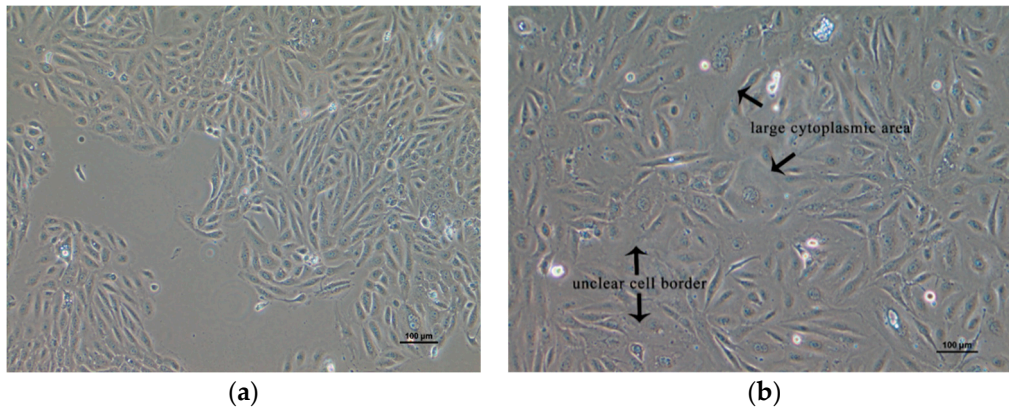

**Figure S1.** Bright field images of OSCC cells (magnification of 100×). (a) H103 parental cell line, (b) H103/cisD2 cell line after 10 rounds of pulse treatment with cisplatin.

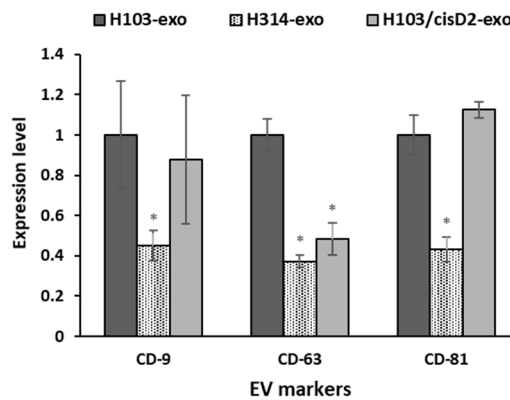

**Figure S2.** Expression levels of EV marker proteins in OSCC-derived EVs. Quantification of signal intensity was conducted using Image J. All the signals were normalized against intensity of HSC70. \*indicated significant differences from EVs derived from H103 cells (H103-exo) ( $n = 3, p < 0.05$ , Two-way Annona, Tukey’s post-hoc).

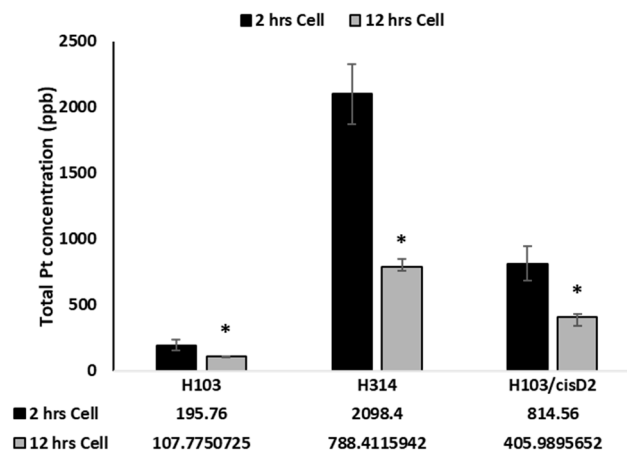

**Figure S3.** Concentration of platinum at 2 hours of cisplatin treatment and after 12 h of cisplatin-free medium incubation. \* indicated significant differences from 2 h cells ( $n = 3, p < 0.05$ , Two-way Anova, Tukey's post-hoc).

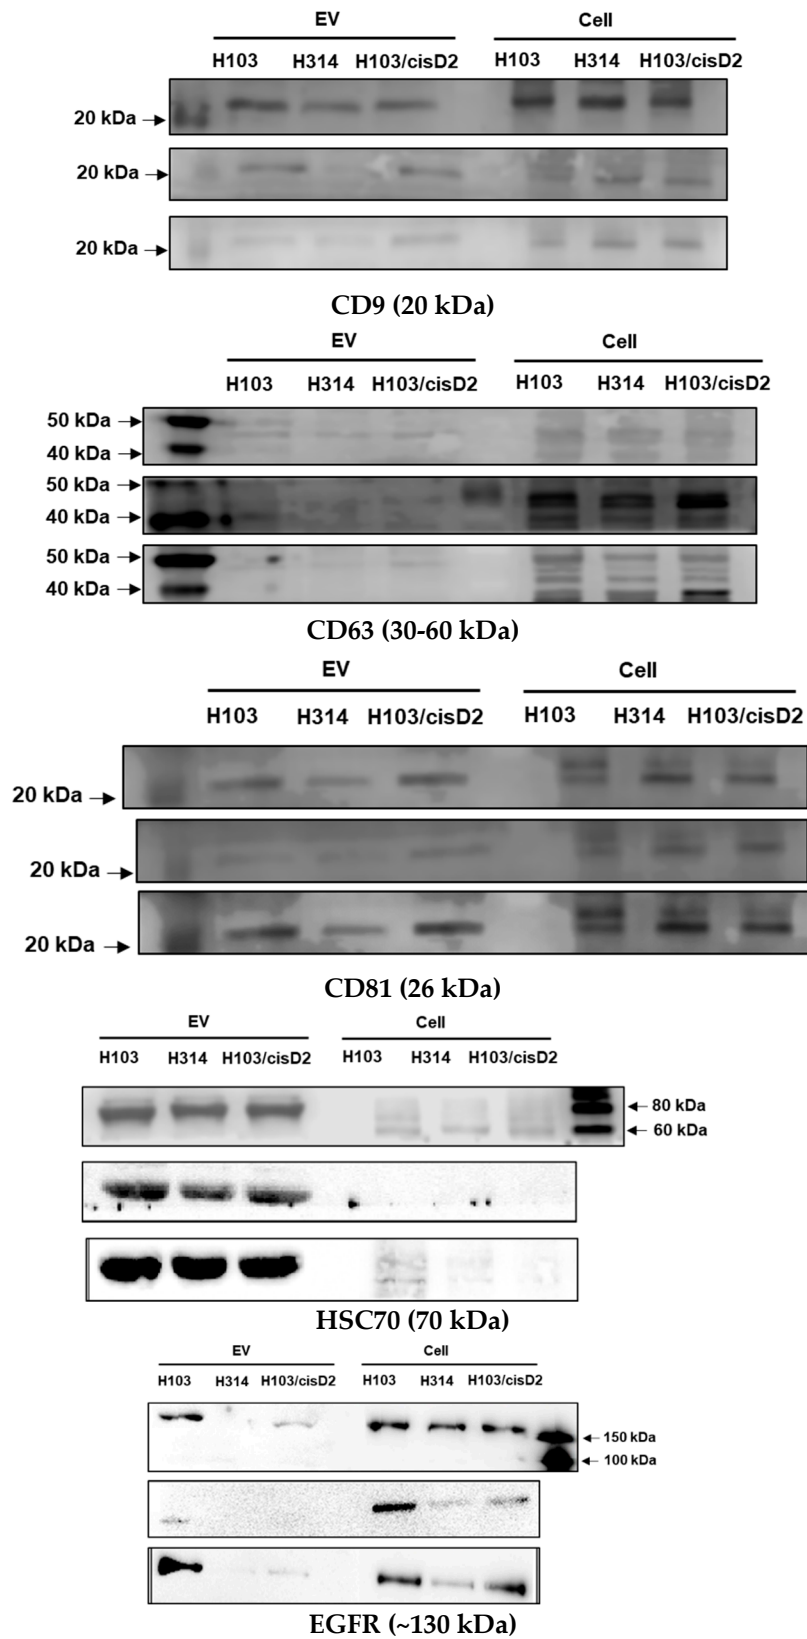

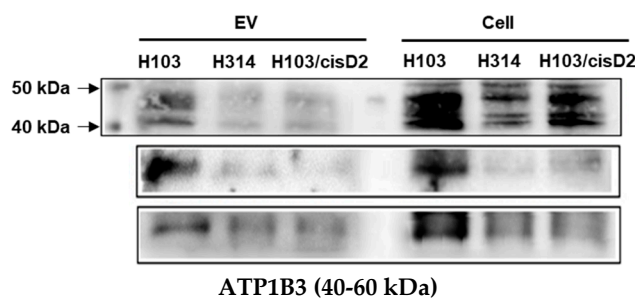

Figure S4. Western blotting (triplicates).

Table S1. List of genes with their proteins differentially regulated in EVs of cisplatin resistant OSCC.

| Gene Name | Compare to H103-EVs, Fold Change of Protein in |          | Gene Name | Compare to H103-EVs, Fold Change of Protein in |          |
|-----------|------------------------------------------------|----------|-----------|------------------------------------------------|----------|
|           | H103/cisD2-EVs                                 | H314-EVs |           | H103/cisD2-EVs                                 | H314-EVs |
| CCT4      | 1.2213                                         | 1.31007  | IGSF3     | -3.32301                                       | -3.37485 |
| EDIL3     | 3.186                                          | 6.23853  | IQGAP1    | -0.822679                                      | -1.40966 |
| RPLP0     | 1.3014                                         | 1.23555  | ITGA2     | -1.81896                                       | -1.40966 |
| TGM2      | 1.90753                                        | 2.38332  | ITGA3     | -1.48316                                       | -2.51412 |
| ALCAM     | -2.50111                                       | -6.21093 | ITGA6     | -3.48457                                       | -2.18924 |
| ANXA1     | -1.3593                                        | -1.44066 | ITGB4     | -4.76825                                       | -6.56137 |
| ARRDC1    | -3.10439                                       | -2.82773 | JUP       | -2.05299                                       | -4.65373 |
| ATP1A1    | -1.30331                                       | -1.61594 | LASP1     | -1.31599                                       | -1.55913 |
| ATP1B3    | -1.651                                         | -1.87647 | MARCKS    | -1.74108                                       | -2.19575 |
| BASP1     | -1.78838                                       | -4.80193 | MMP14     | -3.05341                                       | -3.35638 |
| BSG       | -1.49068                                       | -2.30614 | MPZL1     | -3.16516                                       | -3.79302 |
| CAB39     | -1.95177                                       | -2.64897 | MSN       | -1.09643                                       | -1.95576 |
| CD44      | -1.20358                                       | -1.05904 | MYO1B     | -7.40723                                       | -7.49534 |
| CD59      | -2.16691                                       | -4.11755 | MYOF      | -4.39966                                       | -3.68452 |
| CD82      | -4.1358                                        | -4.50446 | NCKAP1    | -3.46425                                       | -3.66785 |
| CD9       | -2.25156                                       | -2.52558 | NRAS      | -1.1691                                        | -1.6433  |
| CDH3      | -4.46503                                       | -5.63997 | PACSIN3   | -2.74937                                       | -5.57688 |
| CFL1      | -1.44838                                       | -2.3573  | PDCD10    | -3.01543                                       | -3.15708 |
| CTNNA1    | -2.69647                                       | -7.3521  | PKP3      | -2.72952                                       | -5.6661  |
| CTNNA2    | -2.56579                                       | -4.83702 | PLEC      | -2.72199                                       | -6.64841 |
| CTNNB1    | -2.66626                                       | -6.31522 | PLEK2     | -1.62203                                       | -2.48219 |
| CTNND1    | -2.82209                                       | -6.38995 | PLXNA1    | -4.69861                                       | -4.32371 |
| CXADR     | -3.50929                                       | -1.98868 | PROM2     | -2.57304                                       | -4.98848 |
| DIP2B     | -3.28048                                       | -2.85467 | PTGFRN    | -2.95215                                       | -8.19098 |
| DLG1      | -4.03571                                       | -4.16456 | RAB10     | -0.568548                                      | -0.5879  |
| DOCK9     | -2.25212                                       | -2.04113 | RDX       | -2.31205                                       | -2.36078 |
| EGFR      | -1.82431                                       | -3.19202 | RRAS      | -2.42152                                       | -2.89097 |
| EHD2      | -3.90278                                       | -4.67087 | S100A14   | -4.80956                                       | -5.97344 |
| EHD4      | -3.05061                                       | -4.28404 | S100A2    | -4.96587                                       | -3.68058 |
| EPCAM     | -5.16353                                       | -6.23347 | SCARB1    | -2.09409                                       | -2.42528 |
| EPHA2     | -3.1771                                        | -5.6981  | SLC16A1   | -1.97213                                       | -3.05675 |
| EPS8L2    | -1.38227                                       | -2.56317 | SLC1A5    | -3.09421                                       | -4.94067 |
| EZR       | -1.69251                                       | -3.62617 | SLC38A2   | -3.77017                                       | -3.3052  |
| F3        | -3.23329                                       | -6.55877 | SLC39A10  | -3.48145                                       | -3.56164 |
| FSCN1     | -1.05876                                       | -1.78099 | SLC3A2    | -2.25988                                       | -2.9735  |
| GDI2      | -1.16903                                       | -2.67346 | SLC7A5    | -2.69542                                       | -3.11446 |
| GNAI3     | -1.45609                                       | -2.58369 | TACSTD2   | -6.49314                                       | -7.4866  |
| HLA-A     | -1.92629                                       | -1.23085 | TPBG      | -1.50519                                       | -3.33372 |

**Table S2.** Top 10 GO Cell component analysis.

| Pathway ID | Pathway Description       | Count in Gene Set | False Discovery Rate |
|------------|---------------------------|-------------------|----------------------|
| GO:0070062 | Extracellular exosome     | 57                | 1.65e-32             |
| GO:0070161 | Anchoring junction        | 32                | 1.86e-31             |
| GO:0005925 | Focal adhesion            | 30                | 7.58e-31             |
| GO:0030055 | Cell-substrate junction   | 30                | 1.12e-30             |
| GO:0005912 | Adherens junction         | 31                | 1.22e-30             |
| GO:0031988 | Membrane-bounded vesicle  | 58                | 2.72e-29             |
| GO:0030054 | Cell junction             | 38                | 3.79e-27             |
| GO:0044421 | Extracellular region part | 57                | 1.19e-26             |
| GO:0005576 | Extracellular region      | 57                | 9.61e-23             |
| GO:0005886 | Plasma membrane           | 54                | 3.35e-19             |

**Table S3.** Top 10 GO Biological processes analysis.

| Pathway ID | Pathway Description                       | Count in Gene Set | False Discovery Rate |
|------------|-------------------------------------------|-------------------|----------------------|
| GO.0048870 | Cell motility                             | 25                | 1.15E-13             |
| GO.0051674 | Localization of cell                      | 25                | 1.15E-13             |
| GO.0009611 | Response to wounding                      | 24                | 1.29E-13             |
| GO.0016477 | Cell migration                            | 24                | 1.29E-13             |
| GO.0040011 | Locomotion                                | 28                | 1.89E-13             |
| GO.0042060 | Wound healing                             | 22                | 1.90E-12             |
| GO.0006928 | Movement of cell or subcellular component | 28                | 1.95E-12             |
| GO.0007596 | Blood coagulation                         | 18                | 4.39E-10             |
| GO.0032879 | Regulation of localization                | 30                | 1.61E-08             |
| GO.0007155 | Cell adhesion                             | 19                | 4.44E-07             |

**Table S4.** Top 10 KEGG Pathway analysis.

| Pathway ID | Pathway Description                                    | Count in Gene Set | False Discovery Rate | Matched Proteins                                                      |
|------------|--------------------------------------------------------|-------------------|----------------------|-----------------------------------------------------------------------|
| 4810       | Regulation of actin cytoskeleton                       | 13                | 2.13E-10             | CFL1,EGFR,EZR,IQGAP1,ITGA2,ITGA3,ITGA6,ITGB4,MSN,NCKAP1,NRAS,RDX,RRAS |
| 5412       | Arrhythmogenic right ventricular cardiomyopathy (ARVC) | 8                 | 3.95E-08             | CTNNA1,CTNNA2,CTNNB1,ITGA2,ITGA3,ITGA6,ITGB4,JUP                      |
| 5205       | Proteoglycans in cancer                                | 10                | 7.60E-07             | CD44,CTNNB1,EGFR,EZR,IQGAP1,ITGA2,MSN,NRAS,RDX,RRAS                   |
| 4520       | Adherens junction                                      | 6                 | 1.34E-05             | CTNNA1,CTNNA2,CTNNB1,CTNND1,EGFR,IQGA1                                |
| 4670       | Leukocyte transendothelial migration                   | 7                 | 1.34E-05             | CTNNA1,CTNNA2,CTNNB1,CTNND1,EZR,GNAI3,MSN                             |
| 4640       | Hematopoietic cell lineage                             | 6                 | 3.57E-05             | CD44,CD59,CD9,ITGA2,ITGA3,ITGA6                                       |
| 5206       | MicroRNAs in cancer                                    | 7                 | 4.13E-05             | CD44,EGFR,EZR,FSCN1,MARCKS,NRAS,RDX                                   |
| 5213       | Endometrial cancer                                     | 5                 | 4.13E-05             | CTNNA1,CTNNA2,CTNNB1,EGFR,NRAS                                        |
| 5200       | Pathways in cancer                                     | 9                 | 9.08E-05             | CTNNA1,CTNNA2,CTNNB1,EGFR,ITGA2,ITGA3,ITGA6,JUP,NRAS                  |
| 4530       | Tight junction                                         | 6                 | 0.000224             | CTNNA1,CTNNA2,CTNNB1,GNAI3,NRAS,RRAS                                  |

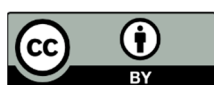

Supplement: cancers-11-01166-s001.pdf [file cancers-11-01166-s001.pdf]
